# Supplementary material for: A mechanistic study of silver nanostructure incorporating reduced graphene oxide via a flow synthesis approach
Source: Royal Society of Chemistry journal article supplement (doi:10.1039/c9nj04881b), 2019-12-16
Supplement: c9nj04881b1.pdf [file c9nj04881b1.pdf]

## Mechanistic Study of Silver Nanostructures Incorporated Reduced Graphene Oxide via Flow Synthesis Approach

Kam Sheng Lau<sup>a</sup>, Sin Tee Tan<sup>b</sup>, Riski Titian Ginting<sup>c</sup>, Poi Sim Khiew<sup>d</sup>, Siew Xian Chin<sup>a,e,\*</sup>, Chin Hua Chia<sup>a,\*</sup>

### Appendix A. Supplementary data

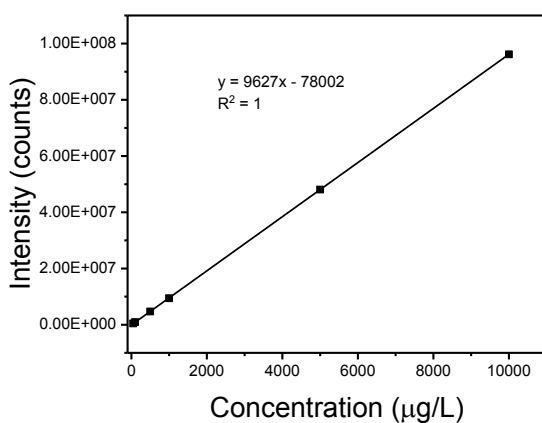

Fig. S1. Calibration curve for Ag<sup>+</sup> ions based on ICP-MS measurements.

$$\text{Calculation for Ag content} = \frac{DF \times [Ag^+] \times Volume}{Mass\ of\ GO} \times 100\%$$

where

|                   |                                                    |
|-------------------|----------------------------------------------------|
| DF                | = Dilution factor of the Ag <sup>+</sup> solution  |
| [Ag] <sup>+</sup> | = Measured concentration of Ag using ICP-MS (µg/L) |
| Volume            | = Volume of Ag solution (mL)                       |
| Mass of GO        | = Total mass of GO used for synthesis (g)          |
